# Supplementary material for: Third dissociation constant of phosphoric acid in H2O and D2O from 75 to 300 °C at p = 20.4 MPa using Raman spectroscopy and a titanium-sapphire flow cell
Source: Royal Society of Chemistry journal article supplement (doi:10.1039/d0cp06266a), 2021-01-01
Supplement: d0cp06266a1.pdf [file d0cp06266a1.pdf]

## Supporting Information :

# Third Dissociation Constant of Phosphoric Acid in H<sub>2</sub>O and D<sub>2</sub>O from 75 to 300 °C at $p = 20.4$ MPa using Raman Spectroscopy and a Titanium-Sapphire Flow Cell

Jacy Conrad<sup>1</sup>, Peter R. Tremaine<sup>1\*</sup>

<sup>1</sup> Department of Chemistry, University of Guelph, Guelph, ON, Canada, N1G 2W1

\* Corresponding author: [tremaine@uoguelph.ca](mailto:tremaine@uoguelph.ca)

**Table S1.** The  $pQ_{3b,OH,m}$  for the reaction  $PO_4^{3-} + H_2O \rightleftharpoons HPO_4^{2-} + OH^-$  in light water at 20.4 MPa.

| $t$<br>(°C) | Solution<br># | $PO_4^{3-}$<br>(mol·kg <sup>-1</sup> ) | $HPO_4^{2-}$<br>(mol·kg <sup>-1</sup> ) | $I$<br>(mol·kg <sup>-1</sup> ) | $pQ_{3b,OH,m}$ |
|-------------|---------------|----------------------------------------|-----------------------------------------|--------------------------------|----------------|
| 75          | 1a            | 0.4309 ± 0.0074                        | 0.0708 ± 0.0021                         | 2.9469 ± 0.0416                | 1.979 ± 0.053  |
|             | 2a            | 0.2345 ± 0.0022                        | 0.0582 ± 0.0006                         | 1.7381 ± 0.0122                | 1.780 ± 0.015  |
| 100         | 1a            | 0.4602 ± 0.0067                        | 0.1095 ± 0.0021                         | 3.1415 ± 0.0380                | 2.084 ± 0.085  |
|             | 1a            | 0.4196 ± 0.0038                        | 0.0916 ± 0.0009                         | 2.9435 ± 0.0211                | 1.784 ± 0.023  |
|             | 2a            | 0.2252 ± 0.0027                        | 0.0858 ± 0.0012                         | 1.7564 ± 0.0158                | 1.538 ± 0.017  |
|             | 2a            | 0.2260 ± 0.0027                        | 0.0797 ± 0.0011                         | 1.7473 ± 0.0159                | 1.576 ± 0.018  |
|             | 3a            | 0.1019 ± 0.0042                        | 0.0683 ± 0.0026                         | 0.8937 ± 0.0263                | 1.410 ± 0.040  |
| 125         | 1a            | 0.4259 ± 0.0059                        | 0.1493 ± 0.0025                         | 3.0841 ± 0.0349                | 1.617 ± 0.039  |
|             | 1a            | 0.3904 ± 0.0036                        | 0.1313 ± 0.0012                         | 2.9063 ± 0.0208                | 1.455 ± 0.016  |
|             | 2a            | 0.2041 ± 0.0029                        | 0.1088 ± 0.0016                         | 1.7178 ± 0.0177                | 1.286 ± 0.016  |
|             | 2a            | 0.2003 ± 0.0025                        | 0.1113 ± 0.0013                         | 1.7077 ± 0.0150                | 1.251 ± 0.013  |
|             | 3a            | 0.0923 ± 0.0044                        | 0.0993 ± 0.0035                         | 0.9174 ± 0.0291                | 1.410 ± 0.040  |
| 150         | 1a            | 0.3404 ± 0.0053                        | 0.1751 ± 0.0027                         | 2.7937 ± 0.0323                | 1.100 ± 0.010  |
|             | 2a            | 0.1637 ± 0.0024                        | 0.1376 ± 0.0018                         | 1.6136 ± 0.0157                | 0.979 ± 0.008  |
|             | 3a            | 0.0668 ± 0.0037                        | 0.1058 ± 0.0039                         | 0.8284 ± 0.0267                | 0.821 ± 0.009  |
|             | 3a            | 0.0600 ± 0.0010                        | 0.1019 ± 0.0014                         | 0.7934 ± 0.0795                | 0.783 ± 0.007  |
| 175         | 1a            | 0.3067 ± 0.0092                        | 0.2304 ± 0.0052                         | 2.7778 ± 0.0549                | 0.813 ± 0.020  |
|             | 2a            | 0.1358 ± 0.0028                        | 0.1625 ± 0.0023                         | 1.5387 ± 0.0184                | 0.780 ± 0.013  |
|             | 2a            | 0.1409 ± 0.0022                        | 0.1665 ± 0.0018                         | 1.5718 ± 0.0149                | 0.773 ± 0.010  |
|             | 3a            | 0.0581 ± 0.0042                        | 0.1273 ± 0.0061                         | 0.8452 ± 0.0342                | 0.584 ± 0.044  |
|             | 3a            | 0.0457 ± 0.0013                        | 0.1108 ± 0.0020                         | 0.7481 ± 0.0110                | 0.605 ± 0.017  |
| 200         | 1a            | 0.2719 ± 0.0049                        | 0.2419 ± 0.0042                         | 2.6498 ± 0.0329                | 0.716 ± 0.014  |
|             | 2a            | 0.1224 ± 0.0020                        | 0.1802 ± 0.0022                         | 1.5227 ± 0.0148                | 0.637 ± 0.011  |
|             | 2a            | 0.1232 ± 0.0025                        | 0.1799 ± 0.0021                         | 1.5256 ± 0.0167                | 0.642 ± 0.012  |
|             | 3a            | 0.0429 ± 0.0029                        | 0.1330 ± 0.0069                         | 0.7908 ± 0.0306                | 0.413 ± 0.044  |
| 225         | 1a            | 0.2610 ± 0.0045                        | 0.2862 ± 0.0047                         | 2.7114 ± 0.0324                | 0.544 ± 0.013  |
|             | 2a            | 0.1101 ± 0.0024                        | 0.1980 ± 0.0023                         | 1.5119 ± 0.0169                | 0.504 ± 0.012  |
|             | 3a            | 0.0335 ± 0.0029                        | 0.1502 ± 0.0056                         | 0.7919 ± 0.0273                | 0.197 ± 0.045  |
|             | 4a            | 0.0126 ± 0.0015                        | 0.0868 ± 0.0021                         | 0.4390 ± 0.0121                | 0.261 ± 0.055  |
| 250         | 1a            | 0.2509 ± 0.0046                        | 0.2951 ± 0.0053                         | 2.6885 ± 0.0345                | 0.500 ± 0.014  |
|             | 2a            | 0.0976 ± 0.0025                        | 0.1997 ± 0.0024                         | 1.4601 ± 0.0173                | 0.444 ± 0.014  |
|             | 3a            | 0.0312 ± 0.0035                        | 0.1433 ± 0.0056                         | 0.7642 ± 0.0299                | 0.208 ± 0.055  |
|             | 4a            | 0.0077 ± 0.0016                        | 0.0857 ± 0.0020                         | 0.4143 ± 0.0122                | 0.061 ± 0.090  |
| 275         | 3a            | 0.0309 ± 0.0040                        | 0.1506 ± 0.0051                         | 0.7812 ± 0.0307                | 0.159 ± 0.060  |
|             | 4a            | 0.0077 ± 0.0014                        | 0.0856 ± 0.0019                         | 0.4140 ± 0.0111                | 0.061 ± 0.082  |
|             | 4a            | 0.0098 ± 0.0011                        | 0.0865 ± 0.0027                         | 0.4256 ± 0.0118                | 0.154 ± 0.054  |
| 300         | 3a            | 0.0379 ± 0.0055                        | 0.1253 ± 0.0051                         | 0.7492 ± 0.0376                | 0.412 ± 0.068  |
|             | 4a            | 0.0077 ± 0.0010                        | 0.0847 ± 0.0019                         | 0.4117 ± 0.0093                | 0.071 ± 0.058  |
|             | 4a            | 0.0124 ± 0.0048                        | 0.0902 ± 0.0030                         | 0.4467 ± 0.0291                | 0.222 ± 0.168  |

The ± uncertainties shown are propagated experimental standard errors.

**Table S2.** The  $pQ_{3b,OD,m}$  for the reaction  $PO_4^{3-} + D_2O \rightleftharpoons DPO_4^{2-} + OD^-$  in heavy water at 20.4 MPa.

| $t$<br>(°C) | Solution<br># | $PO_4^{3-}$<br>(mol·kg <sup>-1</sup> ) | $DPO_4^{2-}$<br>(mol·kg <sup>-1</sup> ) | $I$<br>(mol·kg <sup>-1</sup> ) | $pQ_{3b,OD,m}$ |
|-------------|---------------|----------------------------------------|-----------------------------------------|--------------------------------|----------------|
| 75          | 1b            | 0.2794 ± 0.0039                        | 0.0471 ± 0.0009                         | 1.9701 ± 0.0196                | 1.507 ± 0.014  |
|             | 1b            | 0.4087 ± 0.0030                        | 0.0661 ± 0.0006                         | 2.4697 ± 0.0149                | 2.047 ± 0.024  |
|             | 2b            | 0.1990 ± 0.0017                        | 0.0560 ± 0.0007                         | 1.3565 ± 0.0089                | 1.698 ± 0.012  |
|             | 3b            | 0.0989 ± 0.0033                        | 0.0507 ± 0.0017                         | 0.7421 ± 0.0178                | 1.536 ± 0.032  |
| 100         | 1b            | 0.4132 ± 0.0052                        | 0.1066 ± 0.0015                         | 2.5586 ± 0.0261                | 1.881 ± 0.045  |
|             | 2b            | 0.2020 ± 0.0018                        | 0.0832 ± 0.0008                         | 1.4164 ± 0.0095                | 1.552 ± 0.013  |
|             | 2b            | 0.1996 ± 0.0017                        | 0.0815 ± 0.0007                         | 1.4047 ± 0.0090                | 1.541 ± 0.012  |
|             | 3b            | 0.1077 ± 0.0041                        | 0.0800 ± 0.0030                         | 0.8266 ± 0.0240                | 1.449 ± 0.044  |
|             | 3b            | 0.0954 ± 0.0016                        | 0.0693 ± 0.0011                         | 0.7631 ± 0.0091                | 1.359 ± 0.015  |
| 125         | 1b            | 0.3847 ± 0.0050                        | 0.1412 ± 0.0020                         | 2.5183 ± 0.0263                | 1.535 ± 0.029  |
|             | 2b            | 0.1726 ± 0.0018                        | 0.1118 ± 0.0011                         | 1.3620 ± 0.0103                | 1.199 ± 0.010  |
|             | 2b            | 0.1781 ± 0.0016                        | 0.1070 ± 0.0009                         | 1.3732 ± 0.0090                | 1.257 ± 0.009  |
|             | 3b            | 0.0776 ± 0.0014                        | 0.0906 ± 0.0014                         | 0.7372 ± 0.0089                | 1.041 ± 0.013  |
| 150         | 1b            | 0.3316 ± 0.0045                        | 0.1773 ± 0.0024                         | 2.3923 ± 0.0247                | 1.046 ± 0.009  |
|             | 2b            | 0.1469 ± 0.0022                        | 0.1367 ± 0.0019                         | 1.3144 ± 0.0135                | 0.918 ± 0.008  |
|             | 3b            | 0.0618 ± 0.0019                        | 0.1029 ± 0.0027                         | 0.7026 ± 0.0134                | 0.784 ± 0.014  |
| 175         | 1b            | 0.2649 ± 0.0052                        | 0.2137 ± 0.0042                         | 2.2269 ± 0.0307                | 0.751 ± 0.015  |
|             | 2b            | 0.1197 ± 0.0019                        | 0.1640 ± 0.0022                         | 1.2711 ± 0.0125                | 0.651 ± 0.011  |
|             | 3b            | 0.0385 ± 0.0016                        | 0.1055 ± 0.0048                         | 0.6189 ± 0.0175                | 0.531 ± 0.033  |
| 200         | 1b            | 0.2402 ± 0.0042                        | 0.2540 ± 0.0040                         | 2.2178 ± 0.0261                | 0.561 ± 0.012  |
|             | 1b            | 0.2304 ± 0.0025                        | 0.2235 ± 0.0023                         | 2.1095 ± 0.0154                | 0.652 ± 0.008  |
|             | 2b            | 0.1035 ± 0.0015                        | 0.1744 ± 0.0017                         | 1.2292 ± 0.0100                | 0.535 ± 0.009  |
|             | 2b            | 0.1002 ± 0.0012                        | 0.1706 ± 0.0014                         | 1.2073 ± 0.0079                | 0.540 ± 0.007  |
|             | 3b            | 0.0359 ± 0.0039                        | 0.1502 ± 0.0095                         | 0.7089 ± 0.0370                | 0.196 ± 0.061  |
|             | 3b            | 0.0333 ± 0.0011                        | 0.1313 ± 0.0028                         | 0.6559 ± 0.0106                | 0.279 ± 0.019  |
| 225         | 1b            | 0.2385 ± 0.0047                        | 0.2806 ± 0.0050                         | 2.2706 ± 0.0304                | 0.472 ± 0.014  |
|             | 2b            | 0.0877 ± 0.0010                        | 0.1941 ± 0.0018                         | 1.2095 ± 0.0080                | 0.370 ± 0.007  |
|             | 3b            | 0.0315 ± 0.0017                        | 0.1386 ± 0.0049                         | 0.6653 ± 0.0180                | 0.208 ± 0.032  |
| 250         | 1b            | 0.2259 ± 0.0055                        | 0.3030 ± 0.0063                         | 2.2699 ± 0.0365                | 0.382 ± 0.016  |
|             | 2b            | 0.0765 ± 0.0019                        | 0.1992 ± 0.0026                         | 1.1755 ± 0.0133                | 0.287 ± 0.013  |
|             | 2b            | 0.0781 ± 0.0012                        | 0.1966 ± 0.0024                         | 1.1760 ± 0.0104                | 0.308 ± 0.010  |
|             | 3b            | 0.0289 ± 0.0029                        | 0.1513 ± 0.0069                         | 0.6832 ± 0.0274                | 0.095 ± 0.052  |
|             | 3b            | 0.0249 ± 0.0010                        | 0.1372 ± 0.0031                         | 0.6355 ± 0.0109                | 0.115 ± 0.022  |
|             | 4b            | 0.0040 ± 0.0010                        | 0.0800 ± 0.0019                         | 0.3225 ± 0.0082                | -0.199 ± 0.109 |
| 275         | 3b            | 0.0218 ± 0.0017                        | 0.1454 ± 0.0047                         | 0.6410 ± 0.0174                | 0.007 ± 0.039  |
|             | 4b            | 0.0058 ± 0.0008                        | 0.0703 ± 0.0013                         | 0.3077 ± 0.0063                | 0.071 ± 0.064  |
|             | 4b            | 0.0053 ± 0.0010                        | 0.0732 ± 0.0016                         | 0.3120 ± 0.0078                | -0.006 ± 0.087 |
| 300         | 3b            | 0.0144 ± 0.0022                        | 0.0664 ± 0.0033                         | 0.4337 ± 0.0162                | 0.501 ± 0.072  |
|             | 4b            | 0.0048 ± 0.0010                        | 0.0818 ± 0.0020                         | 0.3295 ± 0.0084                | -0.146 ± 0.090 |
|             | 4b            | 0.0030 ± 0.0010                        | 0.0809 ± 0.0020                         | 0.3201 ± 0.0085                | -0.343 ± 0.144 |

The ± uncertainties shown are propagated experimental standard errors.

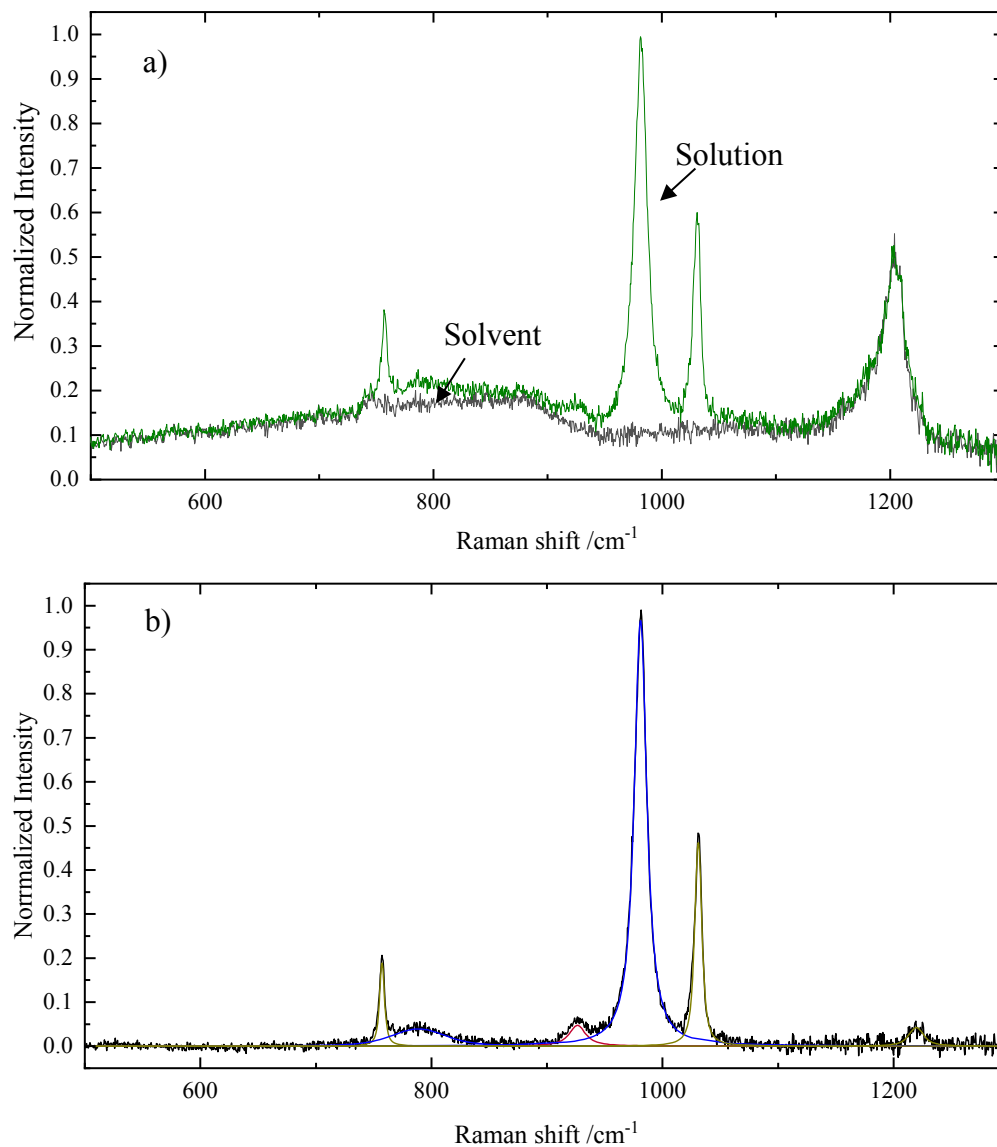

**Figure S1.** a) The reduced isotropic Raman spectrum of  $0.1665 \text{ mol}\cdot\text{kg}^{-1} \text{ K}_2\text{HPO}_4$ ,  $0.1527 \text{ mol}\cdot\text{kg}^{-1} \text{ KOD}$ ,  $0.035 \text{ mol}\cdot\text{kg}^{-1} \text{ KCF}_3\text{SO}_3$  in  $\text{D}_2\text{O}$  (green) and pure  $\text{D}_2\text{O}$  solvent (black) at  $275 \text{ }^\circ\text{C}$  and  $20.4 \text{ MPa}$ . b) The resulting solvent-subtracted spectrum (black) with Voigt functions fitted to the peaks of  $\text{CF}_3\text{SO}_3^-$  (yellow),  $\text{HPO}_4^{2-}$  (blue), and  $\text{PO}_4^{3-}$  (red). Note that the  $\text{D}_2\text{O}$  solvent peak at  $1200 \text{ cm}^{-1}$  subtracts cleanly away leaving the  $\text{CF}_3\text{SO}_3^-$  peak visible at  $1230 \text{ cm}^{-1}$ .

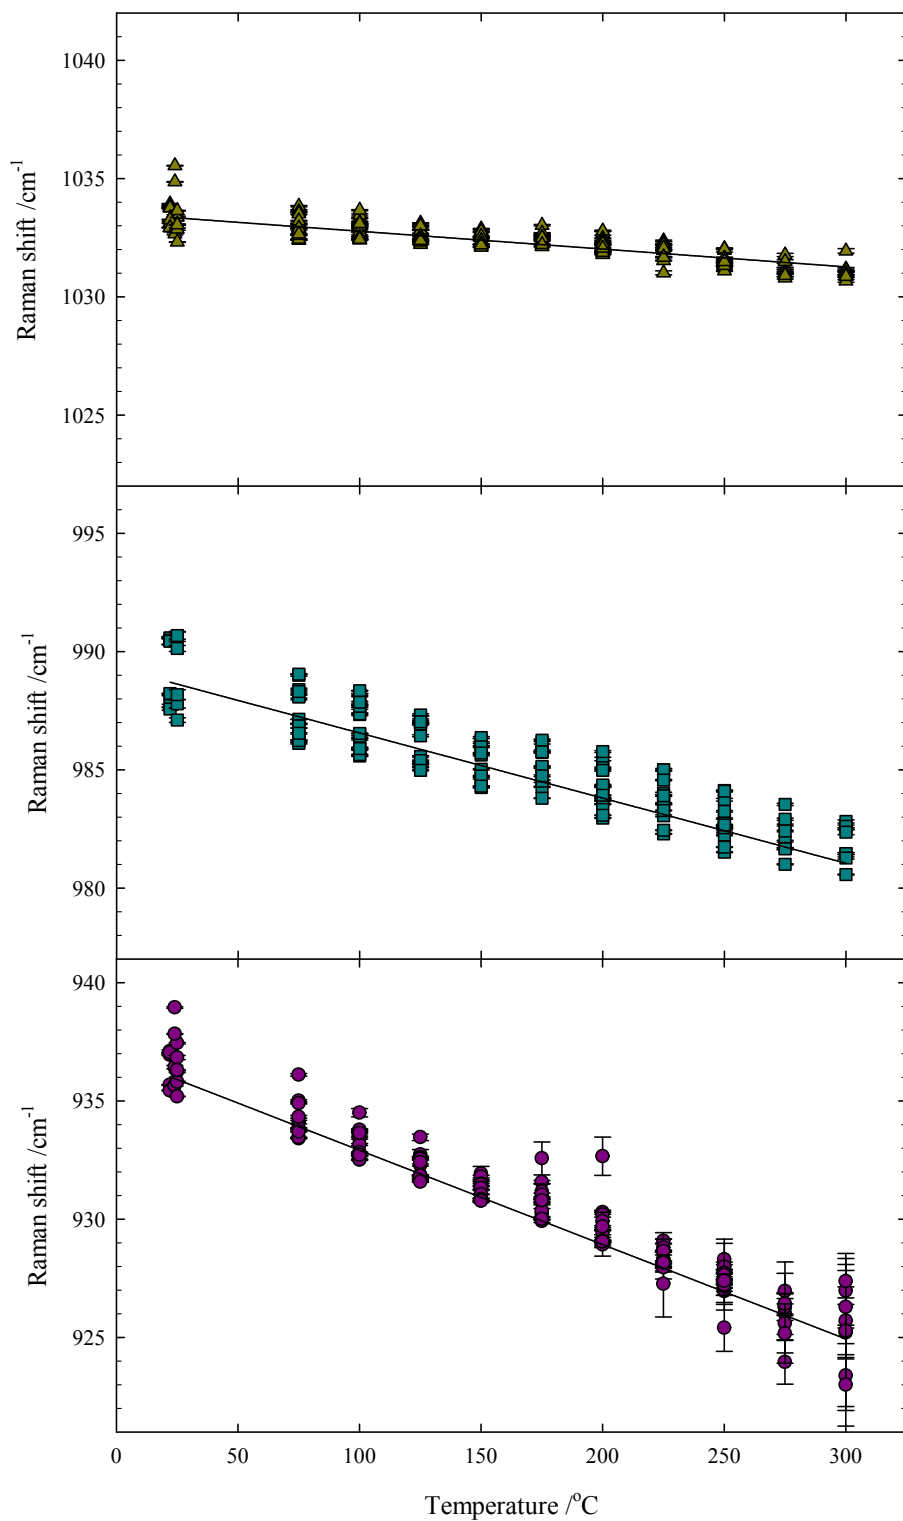

**Figure S2.** The temperature dependence of the Raman shift for the strongest vibrational modes of  $\blacktriangle$   $\text{CF}_3\text{SO}_3^-$ ,  $\blacksquare$   $\text{HPO}_4^{2-}$ , and  $\bullet$   $\text{PO}_4^{3-}$  at  $20.4 \pm 0.4$  MPa in  $\text{D}_2\text{O}$  and  $\text{H}_2\text{O}$ .

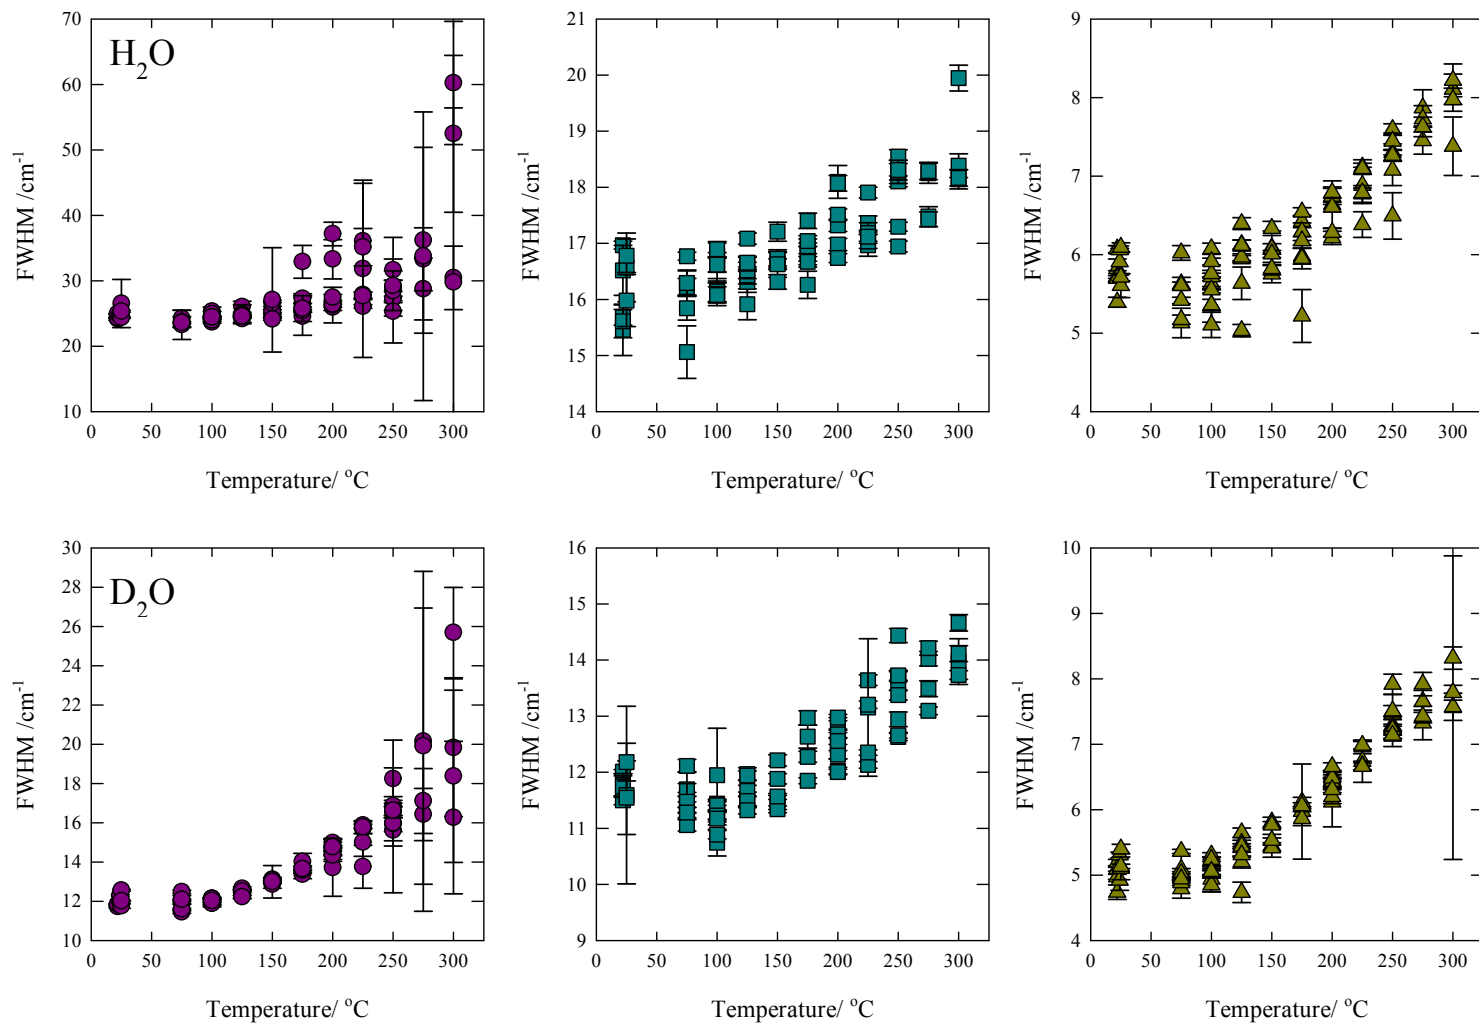

**Figure S3.** The temperature dependence of the full widths at half maximum (FWHM) for the strongest vibrational modes of  $\blacksquare$   $\text{PO}_4^{3-}$ ,  $\blacksquare$   $\text{HPO}_4^{2-}$ , and  $\blacksquare$   $\text{CF}_3\text{SO}_3^-$  at  $20.4 \pm 0.4$  MPa in **(top)**  $\text{H}_2\text{O}$  and **(bottom)**  $\text{D}_2\text{O}$ .

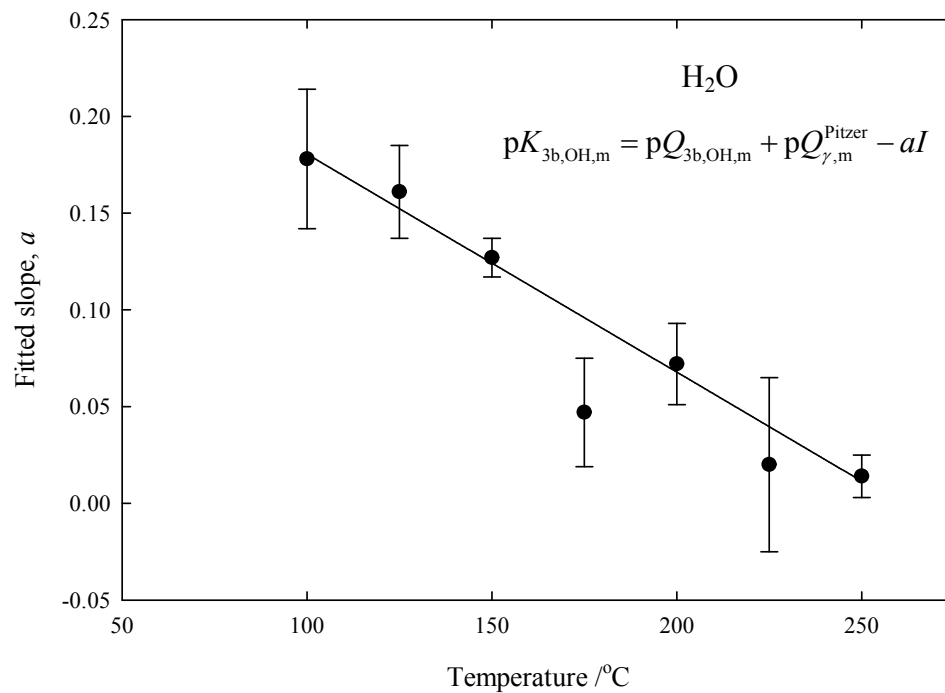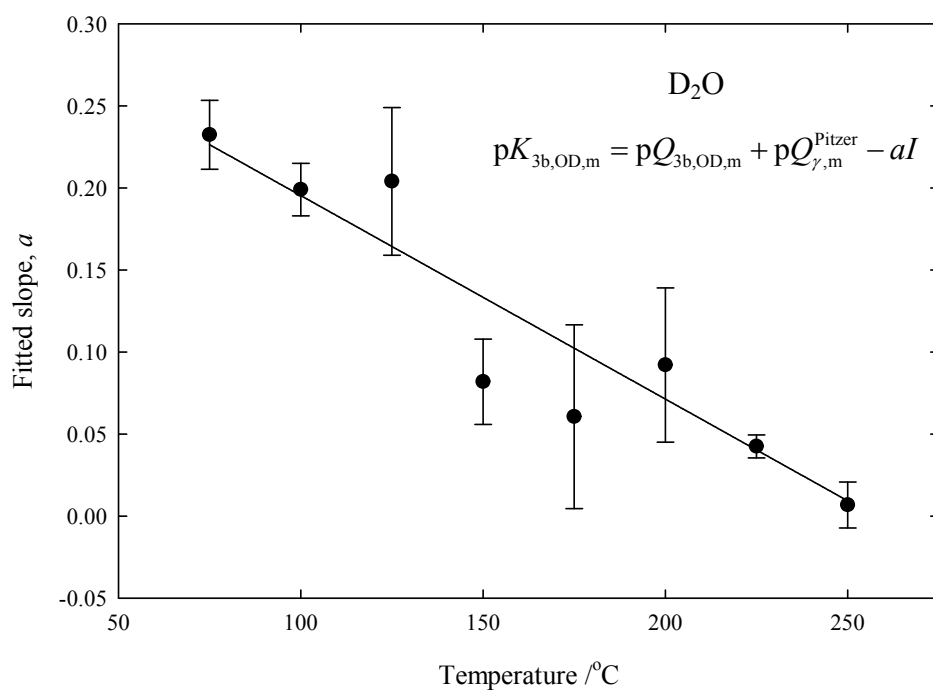

**Figure S4.** The fitted slope values of the Pitzer model equilibrium constant dependence on ionic strength from Table 3 plotted against temperature in **(top)** H<sub>2</sub>O and **(bottom)** D<sub>2</sub>O.
